# Supplementary material for: Runx1 overexpression induces early onset of intervertebral disc degeneration
Source: Aging (Albany NY). 2025 Sep 8;17(9):2369–91. doi: 10.18632/aging.206316 (PMC12517211; doi:10.18632/aging.206316)
Supplement: Supplementary Table 1 [file aging-17-9-206316-s002.xlsx]

## Sheet: Sheet1
Supplementary Table 1. Summary of histopathological score of control and Tam mice stained with H&E in L4-L5
		5M													7M													10M
		control					Krt19CreERT; Rosa26-Runx1 + Tam x2			Krt19CreERT; Rosa26-Runx1 + Tam x3					control					Krt19CreERT; Rosa26-Runx1 + Tam x2			Krt19CreERT; Rosa26-Runx1 + Tam x3					control					Krt19CreERT; Rosa26-Runx1 + Tam x2			Krt19CreERT; Rosa26-Runx1 + Tam x3
NP	cellularity&morphology	0	0	1	1	0	0	1	1	2	2	2	2	2	0	1	1	0	1	1	1	1	2	2	1	1	1	0	1	0	1	0	1	1	2	2	2	2	2	2
	fibrosis	0	0	0	0	0	0	0	0	0	0	0	0	0	0	0	0	0	0	0	1	1	0	1	1	1	1	0	0	0	0	0	0	1	1	1	1	3	1	1
	matrix organization	0	0	0	0	0	1	1	1	0	0	0	0	0	0	0	0	0	0	2	2	1	1	1	1	1	1	0	0	0	0	0	1	2	2	1	1	3	1	1
	total	0	0	1	1	0	1	2	2	2	2	2	2	2	0	1	1	0	1	3	4	3	3	4	3	3	3	0	1	0	1	0	2	4	5	4	4	8	4	4
AF	cellularity	0	0	0	0	0	0	0	0	0	0	0	0	1	0	0	0	0	0	1	1	0	0	1	0	1	1	0	0	0	0	0	0	1	1	1	1	3	1	0
	bulging	0	0	0	0	0	0	0	0	0	0	0	0	0	0	0	0	0	0	1	1	1	1	1	2	1	1	0	1	1	1	0	1	1	2	1	2	3	1	1
	lamellar organization	0	0	0	1	1	0	0	0	1	1	1	1	1	1	0	1	0	1	0	1	0	1	1	1	1	1	1	1	0	1	1	1	1	1	1	1	1	1	1
	clefts/fissures	1	1	1	1	0	1	1	1	1	1	1	0	1	1	1	1	1	1	0	1	1	1	1	1	1	1	1	1	1	1	1	1	1	1	1	2	1	1	1
	total	1	1	1	2	1	1	1	1	2	2	2	1	3	2	1	2	1	2	2	4	2	3	4	4	4	4	2	3	2	3	2	3	4	5	4	6	8	4	3
CEP	cellularity	0	0	0	0	0	0	0	0	1	0	0	0	0	0	0	0	0	0	0	0	0	0	0	0	0	0	0	0	0	0	0	0	0	0	0	0	1	1	0
	fissures/micro-fractures	0	0	0	0	0	0	0	0	0	0	0	0	1	0	0	0	0	0	0	0	0	0	1	1	2	1	0	0	0	0	0	0	0	0	1	1	1	1	1
	Schmorl's node	0	0	0	0	0	0	0	0	2	0	0	0	0	0	0	0	0	0	0	0	0	0	0	0	0	2	0	0	0	0	0	0	0	0	0	2	0	0	0
	total	0	0	0	0	0	0	0	0	3	0	0	0	1	0	0	0	0	0	0	0	0	0	1	1	2	3	0	0	0	0	0	0	0	0	1	3	2	2	1
Interface/boundary	cellularity	0	0	0	0	0	0	0	0	1	0	1	1	1	0	0	0	0	0	1	1	0	0	1	1	1	1	0	0	0	0	0	0	1	1	1	1	2	1	1
	NP-AF boundary	0	0	0	0	0	0	0	0	1	1	1	1	1	0	0	0	0	0	1	1	1	1	1	1	1	1	0	0	0	0	0	1	1	2	1	1	2	1	1
	NP-EP boundary	0	0	0	0	0	0	0	0	0	0	0	0	0	0	0	0	0	0	0	0	0	0	1	0	1	1	0	0	0	0	0	0	0	0	1	1	2	1	1
	disruption of AF lamella integration to EP	0	0	0	0	0	0	0	0	0	0	0	0	0	0	0	0	0	0	0	0	0	0	0	0	1	1	0	0	0	0	0	0	0	0	1	1	2	1	1
	total	0	0	0	0	0	0	0	0	2	1	2	2	2	0	0	0	0	0	2	2	1	1	3	2	4	4	0	0	0	0	0	1	2	3	4	4	8	4	4
total		1	1	2	3	1	2	3	3	9	5	6	5	8	2	2	3	1	3	7	10	6	7	12	10	13	14	2	4	2	4	2	6	10	13	13	17	26	14	12
